# Supplementary material
Source: ML conference proceedings conference paper supplement (https://openaccess.thecvf.com/content/ICCV2025/html/Zhang_VLDrive_Vision-Augmented_Lightweight_ICCV_2025_paper.html)
Supplement: Supplementary file 1 [file Zhang_VLDrive_Vision-Augmented_Lightweight_ICCV_2025_supplemental.pdf]

# VLDrive: Vision-Augmented Lightweight MLLMs for Efficient Language-grounded Autonomous Driving

## Supplementary Material

### 1. Dataset Details

The official language-driven autonomous driving dataset [7] is utilized to train our model, which includes 64K instruction-following data clips collected across 8 towns on CARLA [2] simulation environment. Each clip consists of the following ingredients:

**Multi-sensor input data:** Multi-view RGB images from the front, rear, left, and right cameras, along with corresponding LiDAR data are provided in the dataset.

**Navigation instructions:** Each driving clip has one aligned navigation instruction, which guides the movement of the ego-car. Some examples of navigation instructions are exhibited in Table 1.

Table 1. Examples of navigation instructions.

| Type   | Instruction Examples                                                                           |
|--------|------------------------------------------------------------------------------------------------|
| Start  | Go ahead and start driving.                                                                    |
|        | Feel free to start driving.                                                                    |
| Follow | At the next intersection, just keep heading straight, no turn.                                 |
|        | Maintain your course along this route.<br>Continue driving straight on the designated highway. |
| Turn   | Proceed ahead and make a left turn.                                                            |
|        | Up ahead, just take a left.<br>Next intersection, just swing a right.                          |

### 2. Benchmark Details:

We assess the closed-loop driving performance of our method on the standard LangAuto benchmarks [7]. It is also established based on CARLA simulation but has several significant features that distinguish it from previous benchmarks like Town05 [5] and Longest6 [1]:

**Language-guided driving.** This benchmark leverages the navigation instruction in the natural language format to guide the model’s driving, **without** providing any target points or action commands.

**Various distances.** This benchmark consists of three tracks with varying route lengths: 1) LangAuto features routes exceeding 500 meters. 2) LangAuto-short encompasses routes ranging from 150 to 500 meters and 3) LangAuto-tiny contains routes less than 150 meters.

**Diverse environments.** This benchmark spans 8 towns in CARLA and comprises 16 diverse environments, derived from combinations of 7 distinct weather conditions and 3 different daylight settings.

### 3. Implementation Details

#### 3.1. Model Details:

*Visual Encoder:* Given a sequence of visual data, where each frame includes multi-view camera images and corresponding LiDAR data, we adopt the pretrained visual encoder in LMDrive [7] to integrate multi-view RGB images and LiDAR data and produce a unified feature representation  $\mathbf{F}_i \in \mathbb{R}^{N \times C}$  for each frame, with  $N$  representing the total number of tokens. Specifically, the visual encoder employs a 2D ResNet [3] to extract image features from each view, which are then fused using a Transformer encoder [8] for multi-view feature integration. On the other hand, PointPillars [4] followed by PointNet [6] are utilized to convert raw LiDAR data to BEV features. Afterwards, a Transformer decoder is adopted to integrate the multi-view image features into BEV features and two kinds of learnable queries, generating BEV tokens, waypoint tokens and traffic light tokens, respectively. In LMDrive [7], three downstream tasks, including object detection, future waypoint prediction, and traffic light status classification are introduced to pre-train the visual encoder. In our work, the generated queries  $\mathbf{F}_i \in \mathbb{R}^{N \times C}$  ( $N = 106$ ) from the pre-trained visual encoder, composed of 100 BEV tokens, 5 waypoint tokens and 1 traffic light tokens are delivered to the subsequent connector module.

#### 3.2. Experimental Details:

*Training:* Our proposed model is trained on  $8 \times \text{A100}$  (40G) NVIDIA GPUs. An AdamW optimizer cooperated with a cosine learning rate scheduler is adopted to train our model. The initial learning rate is set to  $1e^{-5}$ , with a weight decay of 0.06, and the total training epoch is 15. We maintain a fixed sampling interval of 2 frames during the training process. *Evaluation:* We conduct the closed-loop driving evaluation using version 0.9.10.1 of the CARLA simulator.

### References

- [1] Kashyap Chitta, Aditya Prakash, Bernhard Jaeger, Zehao Yu, Katrin Renz, and Andreas Geiger. Transfuser: Imitation with transformer-based sensor fusion for autonomous driving.

*IEEE Transactions on Pattern Analysis and Machine Intelligence*, 45(11):12878–12895, 2022. [1](#)

- [2] Alexey Dosovitskiy, German Ros, Felipe Codevilla, Antonio Lopez, and Vladlen Koltun. Carla: An open urban driving simulator. In *Conference on robot learning*, pages 1–16. PMLR, 2017. [1](#)
- [3] Kaiming He, Xiangyu Zhang, Shaoqing Ren, and Jian Sun. Deep residual learning for image recognition. In *Proceedings of the IEEE conference on computer vision and pattern recognition*, pages 770–778, 2016. [1](#)
- [4] Alex H Lang, Sourabh Vora, Holger Caesar, Lubing Zhou, Jiong Yang, and Oscar Beijbom. Pointpillars: Fast encoders for object detection from point clouds. In *Proceedings of the IEEE/CVF conference on computer vision and pattern recognition*, pages 12697–12705, 2019. [1](#)
- [5] Aditya Prakash, Kashyap Chitta, and Andreas Geiger. Multi-modal fusion transformer for end-to-end autonomous driving. In *Proceedings of the IEEE/CVF conference on computer vision and pattern recognition*, pages 7077–7087, 2021. [1](#)
- [6] Charles R Qi, Wei Liu, Chenxia Wu, Hao Su, and Leonidas J Guibas. Frustum pointnets for 3d object detection from rgb-d data. In *Proceedings of the IEEE conference on computer vision and pattern recognition*, pages 918–927, 2018. [1](#)
- [7] Hao Shao, Yuxuan Hu, Letian Wang, Steven L Waslander, Yu Liu, and Hongsheng Li. Lmdrive: Closed-loop end-to-end driving with large language models. *arXiv preprint arXiv:2312.07488*, 2023. [1](#)
- [8] Ashish Vaswani, Noam Shazeer, Niki Parmar, Jakob Uszkoreit, Llion Jones, Aidan N Gomez, Łukasz Kaiser, and Illia Polosukhin. Attention is all you need. *Advances in neural information processing systems*, 30, 2017. [1](#)
